# Supplementary material for: Influence of Femtosecond Laser Modification on Biomechanical and Biofunctional Behavior of Porous Titanium Substrates
Source: MDPI journal article supplement (doi:10.3390/ma15092969), 2022-04-19
Supplement: s1 [file s1]

# Influence of Femtosecond Laser Modification on Biomechanical and Biofunctional Behavior of Porous Titanium Substrates

Ana M. Beltrán <sup>1</sup>, Mercè Giner <sup>2</sup>, Ángel Rodríguez <sup>3,\*</sup>, Paloma Trueba <sup>1</sup>, Luisa M. Rodríguez-Albelo <sup>1,\*</sup>, M. Angeles Vázquez-Gómez <sup>4</sup>, Vanda Godinho <sup>1</sup>, Ana Alcudia <sup>5</sup>, José M. Amado <sup>3</sup>, Carmen López-Santos <sup>6,7</sup> and Yadir Torres <sup>1</sup>

<sup>1</sup> Departamento de Ingeniería y Ciencia de los Materiales y del Transporte, Escuela Politécnica Superior, 41011, Universidad de Sevilla, Seville, Spain; abeltran3@us.es (A.M.B.); ptrueba@us.es (P.T.); vfortio@us.es (V.G.); ytorres@us.es (Y.T.)

<sup>2</sup> Departamento de Citología e Histología Normal y Patológica, e, Universidad de Sevilla, Seville, Spain; mginer@us.es

<sup>3</sup> Departamento Ingeniería Naval e Industrial, Escuela Politécnica Superior, Campus Industrial, Universidade da Coruña, 15403, Ferrol, Spain; jose.amado.paz@udc.es

<sup>4</sup> Departamento de Medicina, Universidad de Sevilla, Seville, Spain; mavazquez@us.es

<sup>5</sup> Departamento de Química Orgánica y Farmacéutica, Facultad de Farmacia, 41005, Universidad de Sevilla, Seville, Spain; aalcudia@us.es

<sup>6</sup> Departamento de Física Aplicada I, Escuela Politécnica Superior, 41011, Universidad de Sevilla, Seville, Spain. mlopez13@us.es

<sup>7</sup> Nanotecnología en Superficies y Plasma, Instituto de Ciencia de Materiales de Sevilla, 41092, Seville, Spain

\* Correspondence: angel.rcarballo@udc.es (Á.R.); lralbelo@us.es (L.M.R.-A.)

## Supplementary information

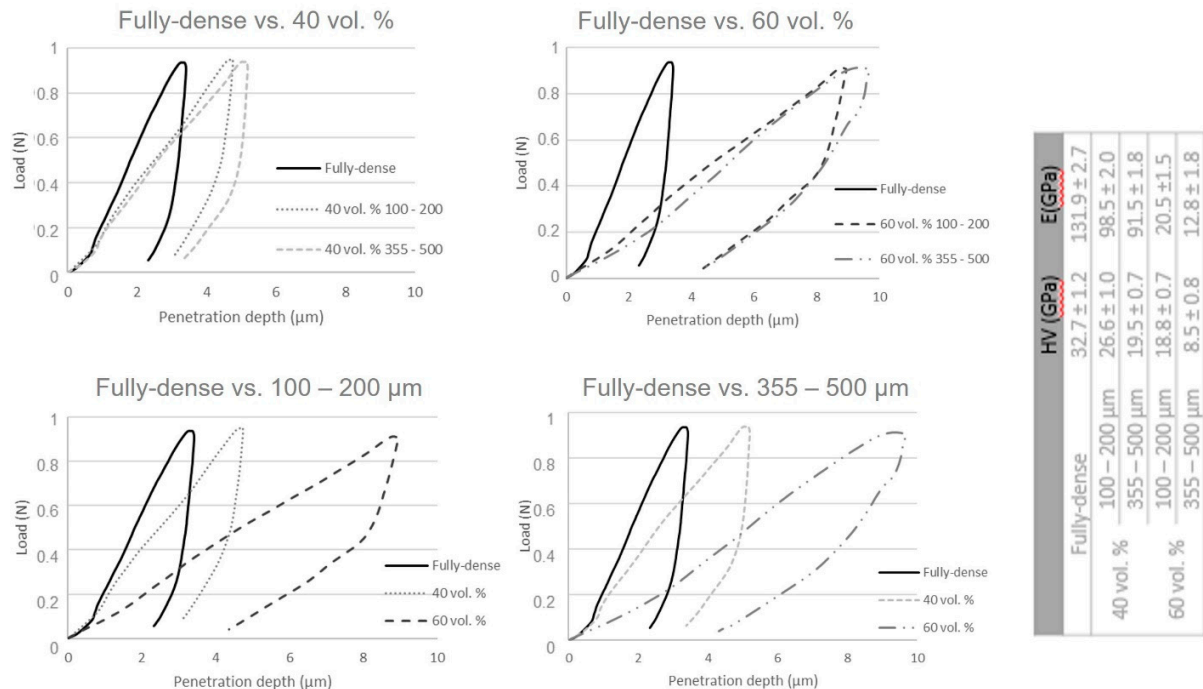

**Figure S1.** *P-h* curves of the study substrates modified by femtosecond and calculated mechanical properties based on Oliver and Pharr method.

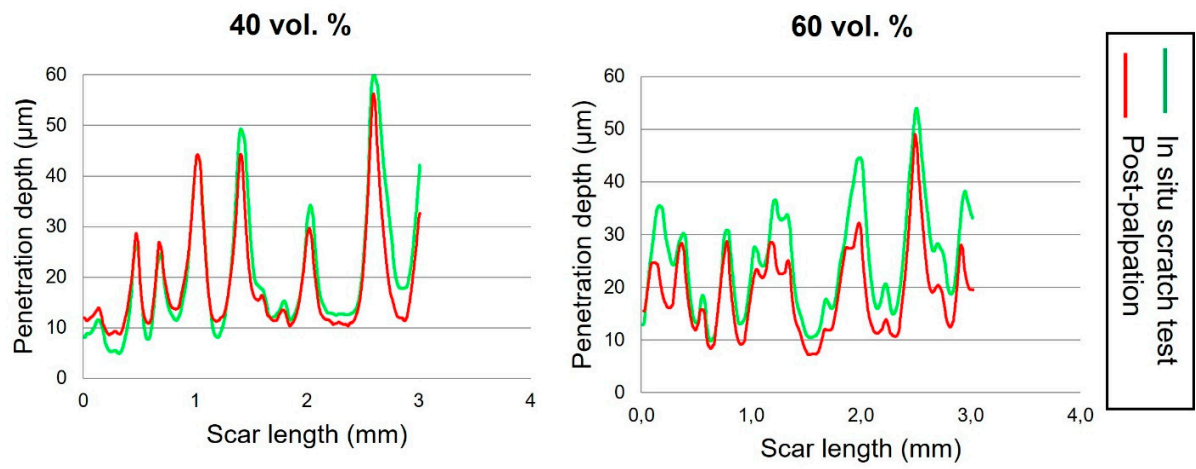

**Figure S2.** Resistance to penetration evaluated by scratch tests, for the pore range size 100 – 200  $\mu\text{m}$  and two porosities.

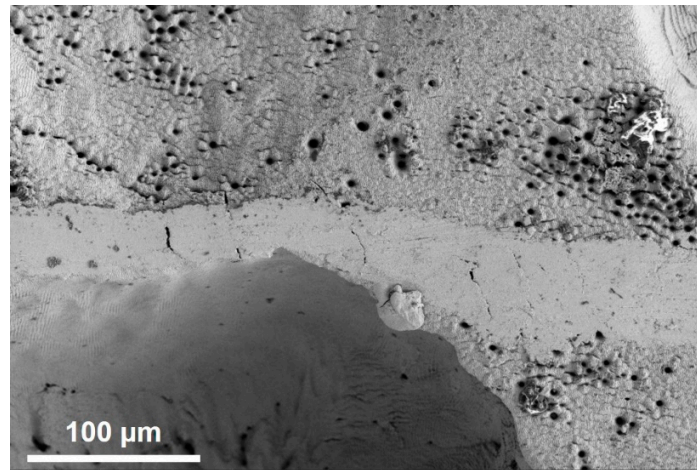

**Figure S3.** Scanning electron microscopy image of the scar on a substrate of 60 vol. % and pore range size 355 – 500  $\mu\text{m}$ .
